# Supplementary material for: Molecular basis of polyspecific drug binding and transport by OCT1 and OCT2
Source: PubMed Central journal article supplement — bioRxiv. 2023 Mar 16:2023.03.15.532610. Preprint. [Version 1] doi: 10.1101/2023.03.15.532610 (PMC10055046; doi:10.1101/2023.03.15.532610), 2023-03-16
Supplement: NIHPP2023.03.15.532610V1-supplement-1.pdf [file NIHPP2023.03.15.532610V1-supplement-1.pdf]

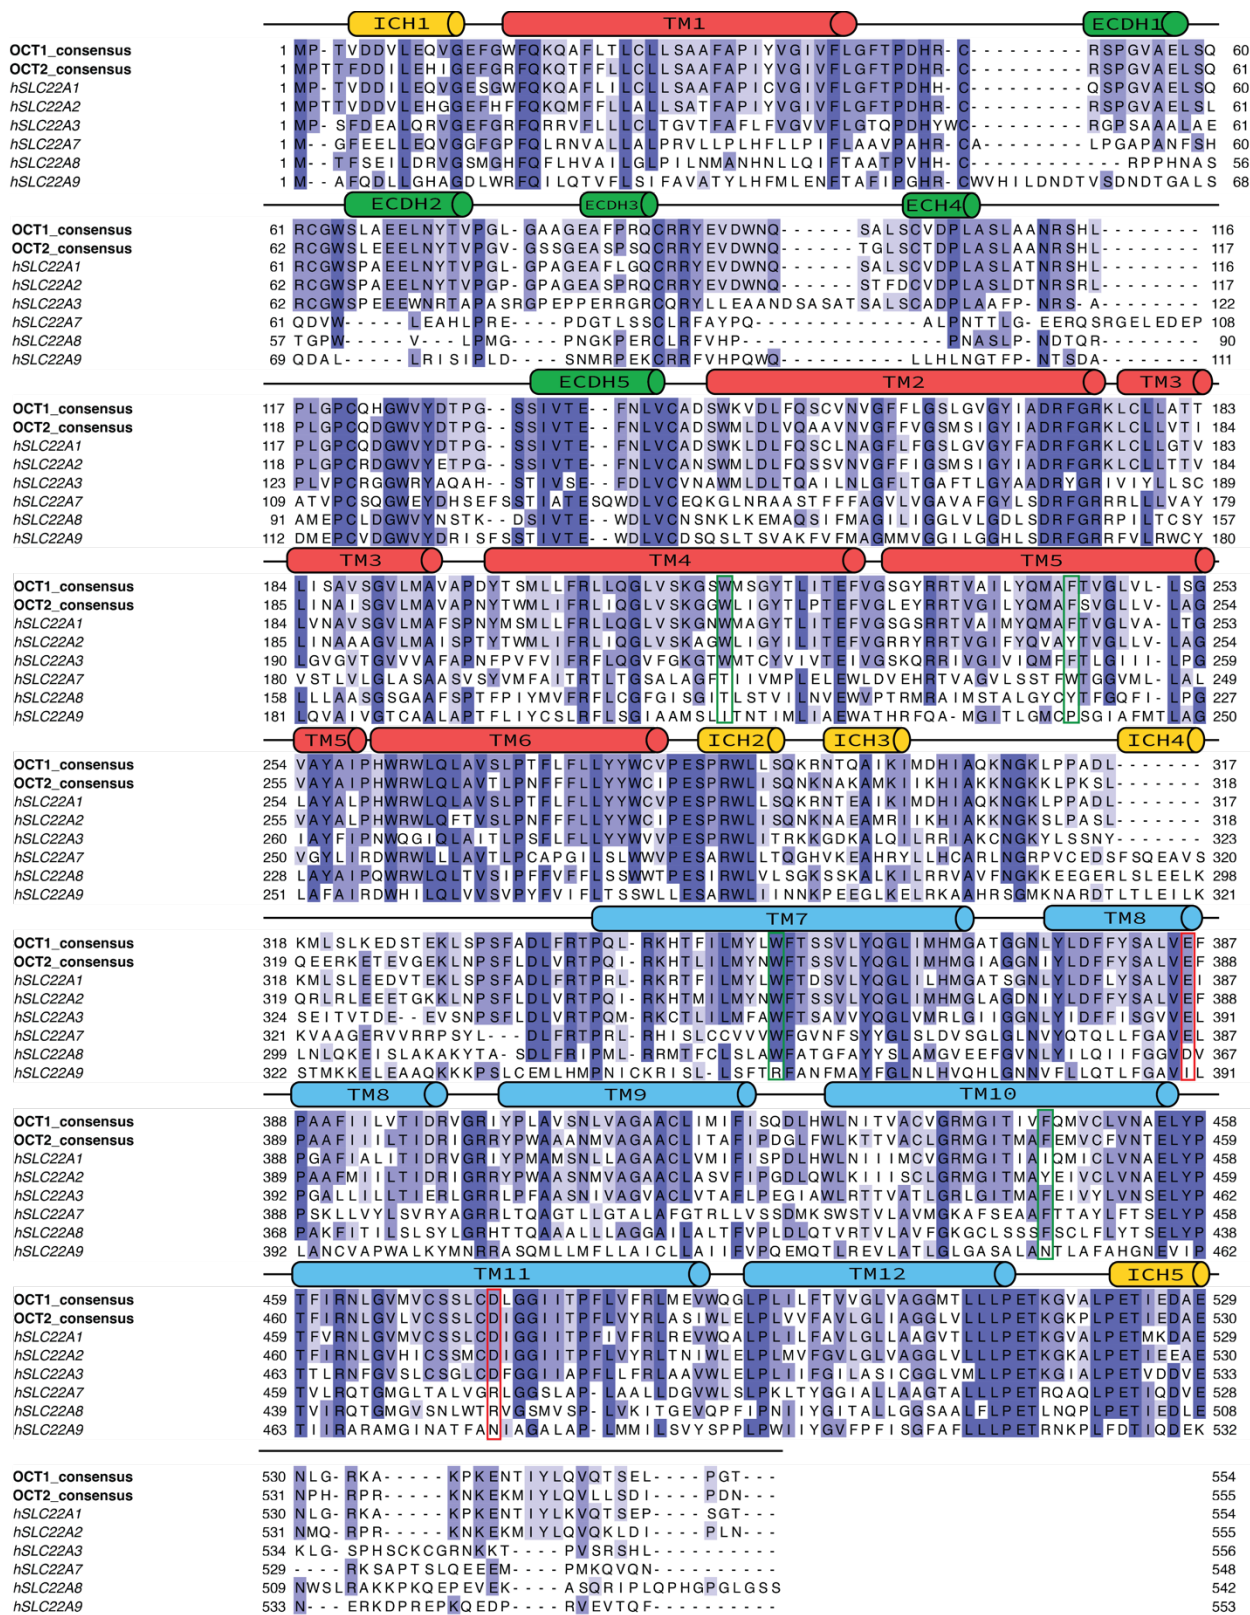

731

732 Supplemental Figure 1 | Multiple Sequence alignment.

733 Multiple sequence alignment of OCT1<sub>CS</sub>, human OCTs (SLC22A1-3), and representative human  
734 OATs (SLC22A7-9). Sequences are aligned using MAFFT<sup>56</sup>. E386 and D474 (numbering  
735 according to hOCT1) positions are highlighted in red and 217, 244, 354, and 446 (numbering  
736 according to hOCT1) in green.  
737
